# Supplementary material for: Sema3A promotes the resolution of cardiac inflammation after myocardial infarction
Source: Springer Nature journal article supplement (doi:10.1007/s00395-017-0630-5), 2017-05-24
Supplement: MOESM1 [file 12312806]

Supplementary Figure 1

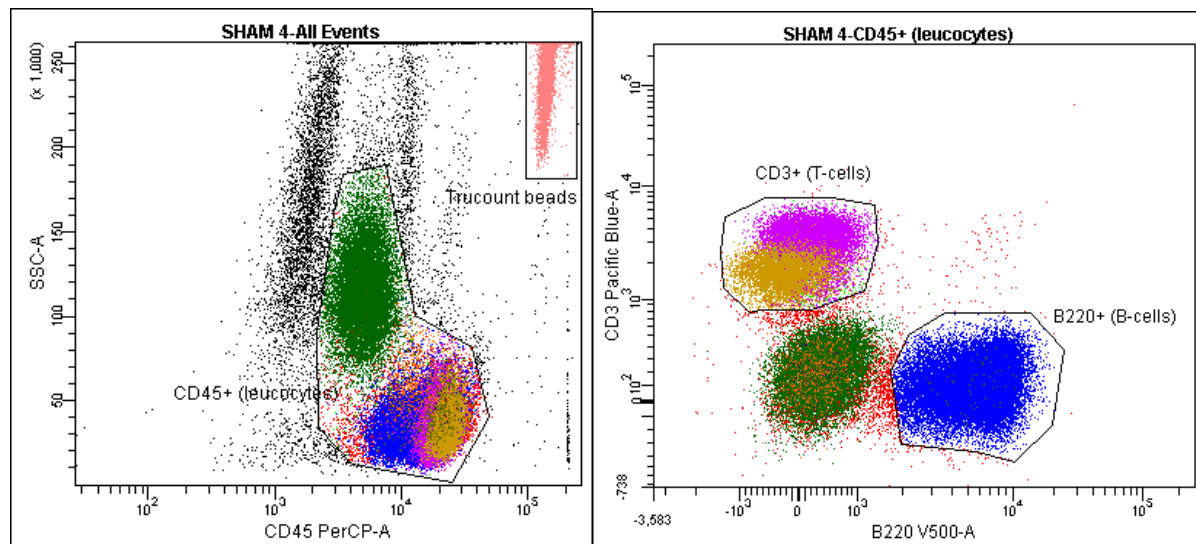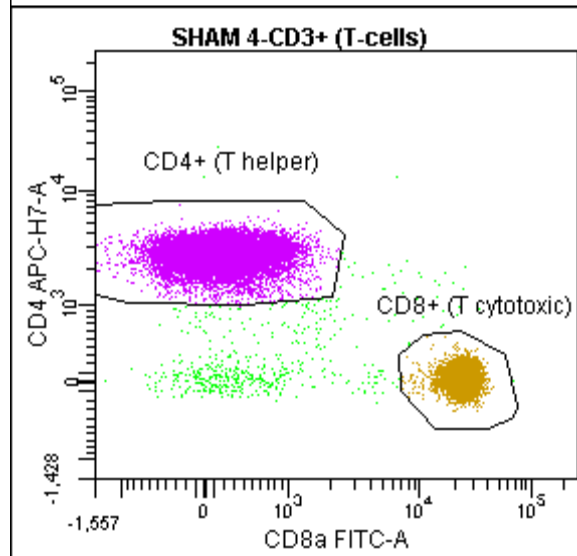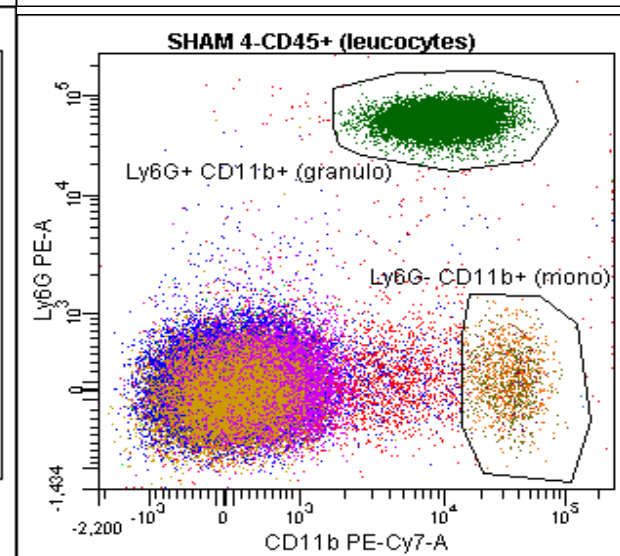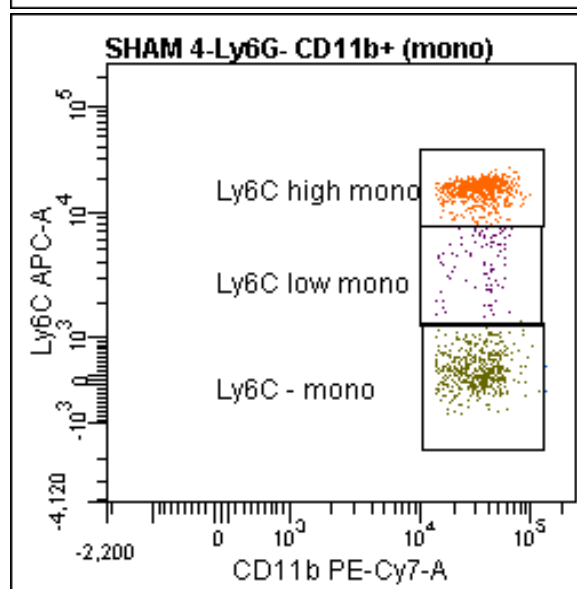

Tube: SHAM 4

| Population             | #Events | %Parent | %Total |
|------------------------|---------|---------|--------|
| All Events             | 100,000 | ####    | 100.0  |
| CD45+ (leucocytes)     | 65,805  | 65.8    | 65.8   |
| CD3+ (T-cells)         | 19,675  | 29.9    | 19.7   |
| CD4+ (T helper)        | 13,471  | 68.5    | 13.5   |
| CD8+ (T cytotoxic)     | 5,696   | 29.0    | 5.7    |
| B220+ (B-cells)        | 24,640  | 37.4    | 24.6   |
| Ly6G+ CD11b+ (granulo) | 15,011  | 22.8    | 15.0   |
| Ly6G- CD11b+ (mono)    | 1,241   | 1.9     | 1.2    |
| Ly6C high mono         | 646     | 52.1    | 0.6    |
| Ly6C low mono          | 99      | 8.0     | 0.1    |
| Ly6C - mono            | 504     | 40.6    | 0.5    |
| Truocount beads        | 27,206  | 27.2    | 27.2   |
